# Supplementary material for: Maternal High-Fat Diet During Pre-Conception and Gestation Predisposes Adult Female Offspring to Metabolic Dysfunction in Mice
Source: PubMed Central journal article supplement (PMC8801938; doi:10.3389/fendo.2021.780300), 2022-01-17
Supplement: DataSheet_1.pdf [file DataSheet_1.pdf]

# Supplemental Figure 1

Newborn P1 Pancreas

A

Ctrl

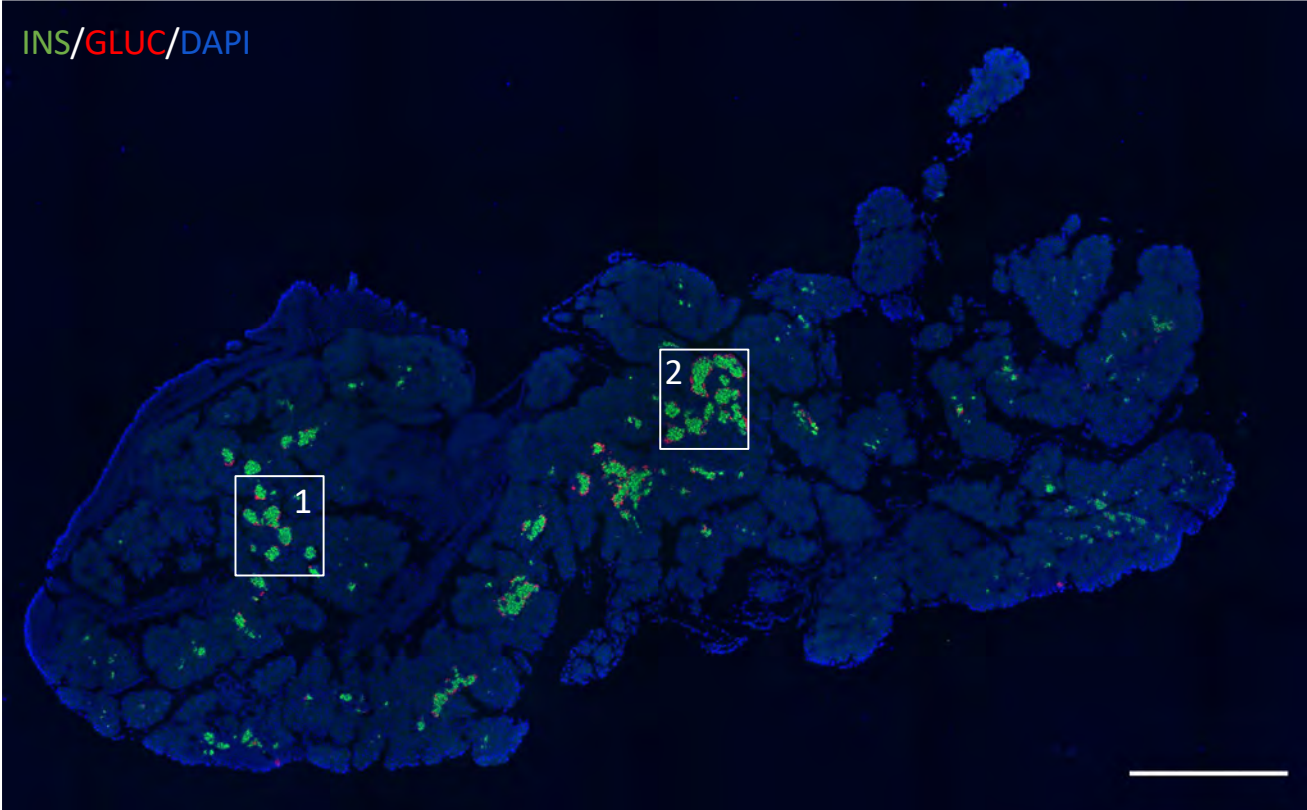

HFD

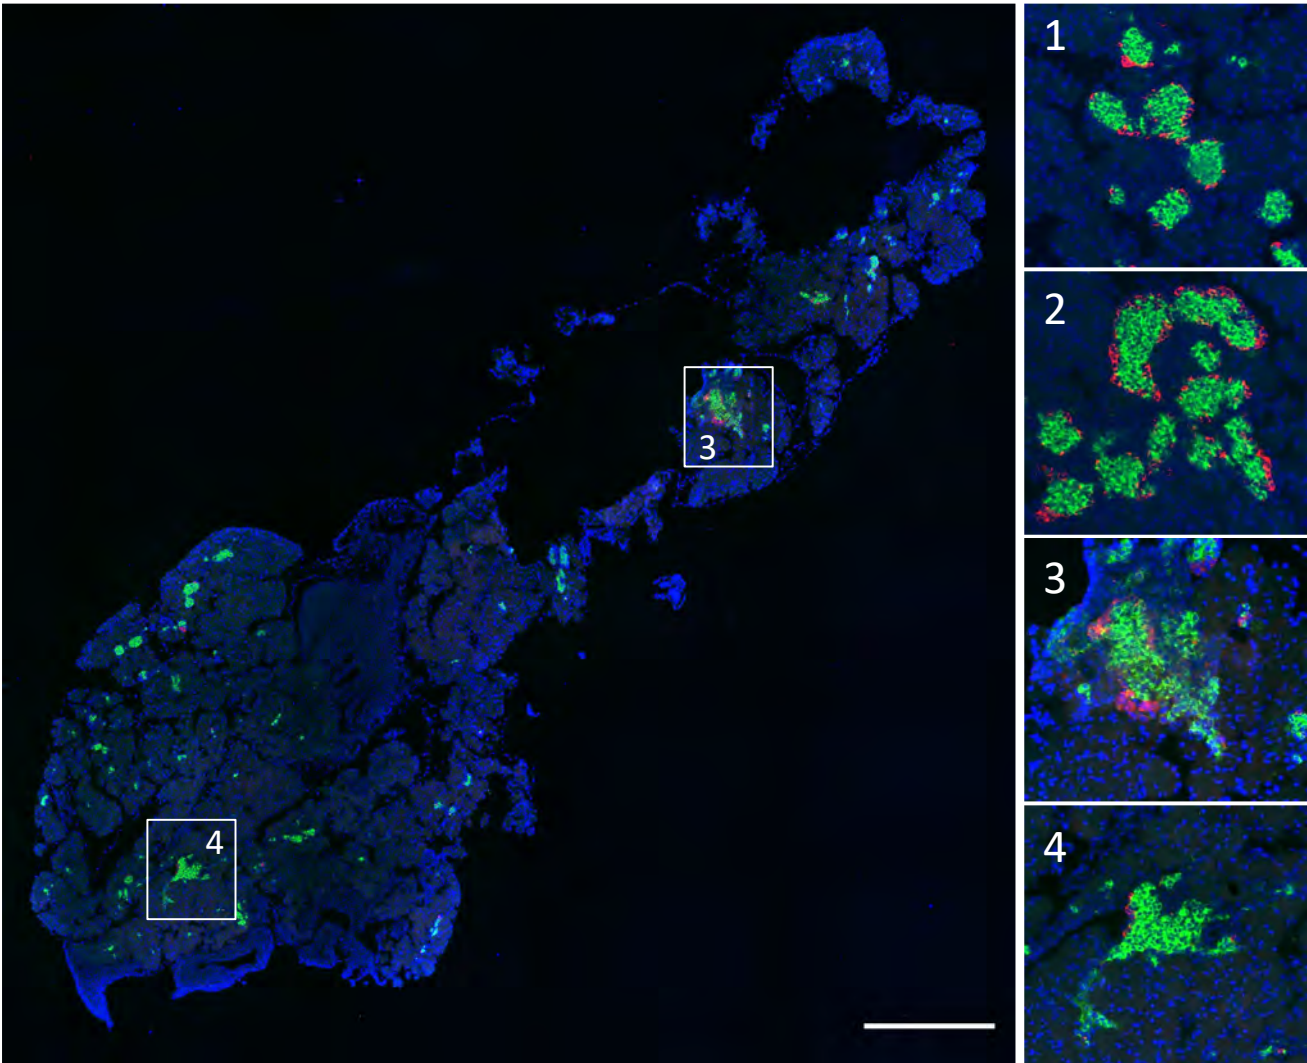

# Supplemental Figure 2

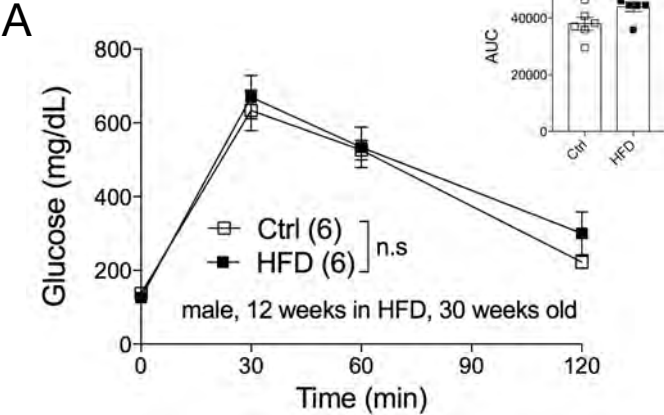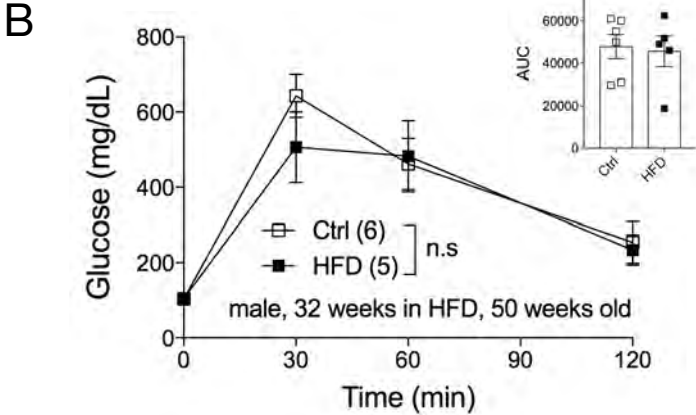

# Supplemental Figure 3

## Adult Female Pancreas

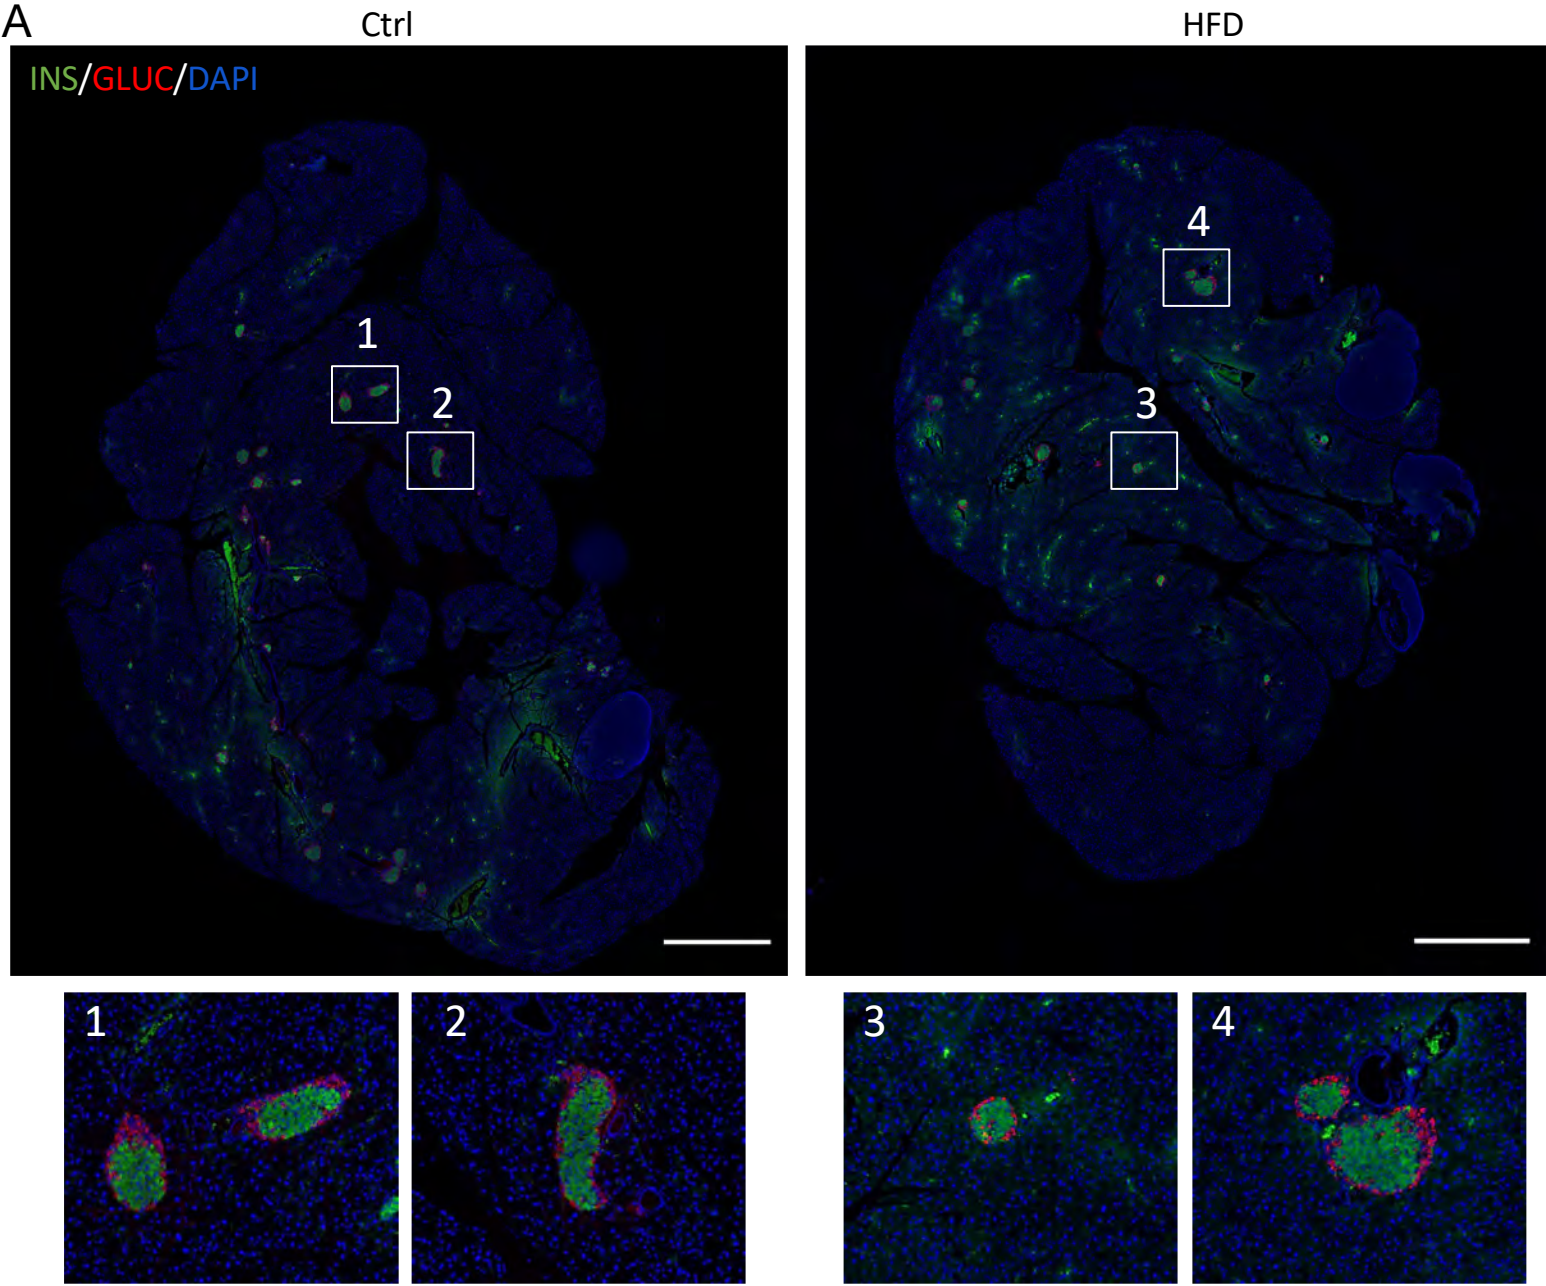

## Legends

### **Supplemental Figure 1.** *Newborn Ctrl and HFD offspring pancreas image*

Enlarged P1 newborn Ctrl and HFD offspring pancreas image of Figure 1L at 10x magnification. Insulin (green) staining localizes to beta-cells, glucagon (red) localizes to alpha-cells, and DAPI (blue) stains nuclei of the cells. Picture insets 1-4 are enlarged to show islet morphology at 10x. Scale bars are 500  $\mu\text{m}$ .

### **Supplemental Figure 2.** *Male Ctrl and HFD offspring under HFD metabolic tests*

IPGTT of males under 12 and 32 weeks of HFD with AUC (n=6, 5-6 Ctrl and HFD offspring, **A**, **B**). At least 3 litters per treatment were used (**A**, **B**). Error bars represented  $\pm$  SEM. No significant interaction effect was found. Statistical analysis was performed using two-way ANOVA Sidak's multiple comparisons (**A**, **B**)

### **Supplemental Figure 3.** *Adult female Ctrl and HFD offspring pancreas image*

Enlarged adult female Ctrl and HFD offspring pancreas image of Figure 5G at 10x magnification. Insulin (green) staining localizes to beta-cells, glucagon (red) localizes to alpha-cells, and DAPI (blue) stains nuclei of the cells. Picture insets 1-4 are enlarged to show islet morphology at 10x. Scale bars are 500  $\mu\text{m}$ .
